# Supplementary material for: Alteration of fatty acid oxidation by increased CPT1A on replicative senescence of placenta-derived mesenchymal stem cells
Source: PubMed Central journal article supplement (PMC6941254; doi:10.1186/s13287-019-1471-y), 2020-01-03

Additional file\_Figure S1

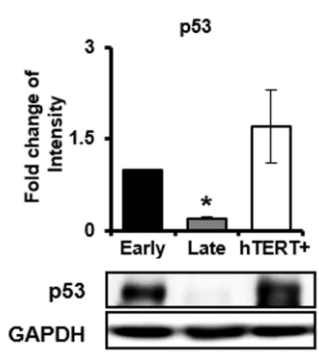

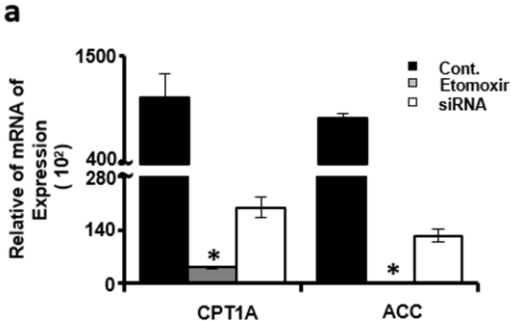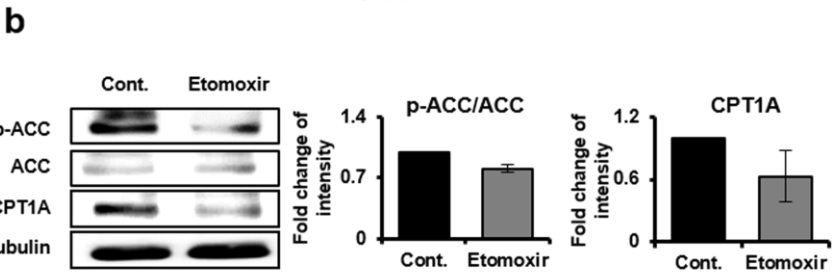

Additional file\_Figure S3

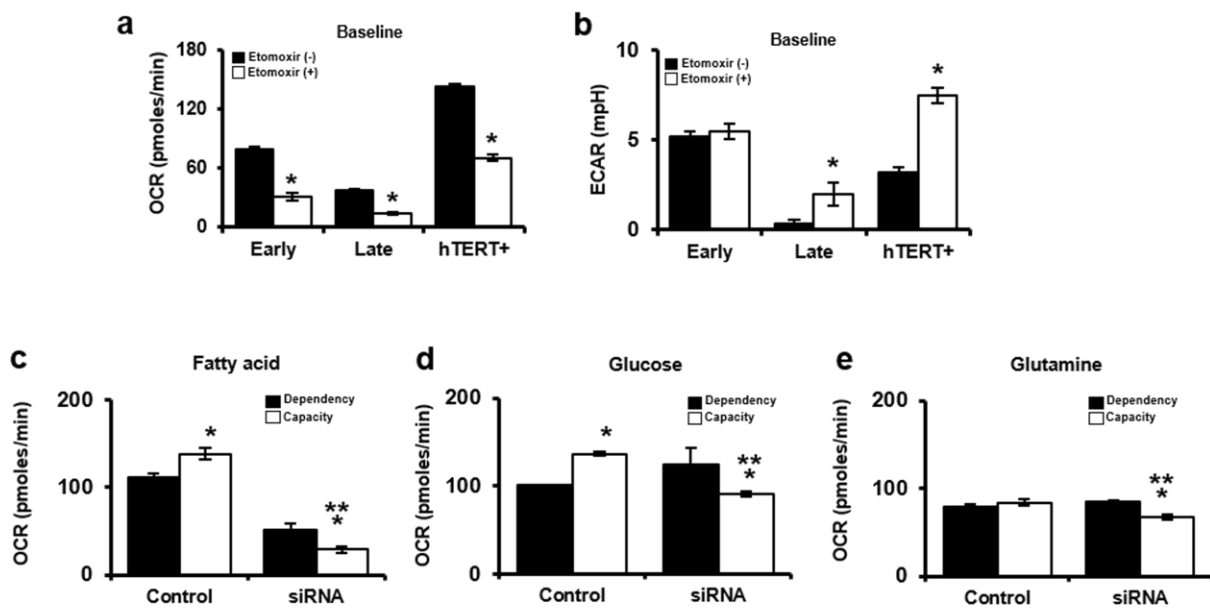

Supplement: 13287_2019_1471_MOESM1_ESM.pdf [file 13287_2019_1471_MOESM1_ESM.pdf]
